# Supplementary material
Source: HighWire-hosted journal article supplement (https://erj.ersjournals.com/content/60/6/2200546)

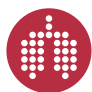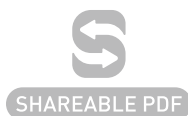

# Increasing physical activity in severe asthma: a systematic review and meta-analysis

Rebecca F. McLoughlin <sup>1,2,3</sup>, Vanessa L. Clark <sup>1,2,3</sup>, Paola D. Urroz <sup>1,2,3</sup>, Peter G. Gibson <sup>1,2,4</sup> and Vanessa M. McDonald <sup>1,2,3,4</sup>

<sup>1</sup>National Health and Medical Research Council, Centre of Excellence in Treatable Traits, Newcastle, Australia. <sup>2</sup>Hunter Medical Research Institute, Newcastle, Australia. <sup>3</sup>School of Nursing and Midwifery, University of Newcastle, Newcastle, Australia. <sup>4</sup>Dept of Respiratory and Sleep Medicine, John Hunter Hospital, Newcastle, Australia.

Corresponding author: Vanessa M. McDonald ([vanessa.mcdonald@newcastle.edu.au](mailto:vanessa.mcdonald@newcastle.edu.au))

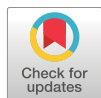

Shareable abstract (@ERSpublications)

**The evidence regarding the effectiveness of interventions in improving physical activity, exercise capacity, asthma control and quality of life in adults with moderate-to-severe asthma is promising; however, further research in this area is needed** <https://bit.ly/3OJLcSM>

**Cite this article as:** McLoughlin RF, Clark VL, Urroz PD, *et al.* Increasing physical activity in severe asthma: a systematic review and meta-analysis. *Eur Respir J* 2022; 60: 2200546 [DOI: 10.1183/13993003.00546-2022].

This single-page version can be shared freely online.

Copyright ©The authors 2022.

This version is distributed under the terms of the Creative Commons Attribution Non-Commercial Licence 4.0. For commercial reproduction rights and permissions contact [permissions@ersnet.org](mailto:permissions@ersnet.org)

Received: 14 March 2022  
Accepted: 23 June 2022

## Abstract

**Introduction** Physical inactivity is common in asthma and is recognised as an important modifiable risk for poor clinical outcomes such as impaired asthma control and health-related quality of life (HRQoL). Despite evidence supporting the role of physical activity in reducing the risk of these outcomes, little is known about optimal interventions for increasing physical activity in those with severe disease. This systematic review and meta-analysis evaluates the effectiveness of interventions in increasing physical activity in severe asthma.

**Methods** MEDLINE, the Cumulative Index to Nursing and Allied Health Literature, Embase, PubMed, Informit, SPORTDiscus and Cochrane databases were searched up to September 2021 for physical activity-based intervention studies that assessed physical activity outcomes (*e.g.* steps per day, time spent undertaking physical activity) in adults with severe asthma. Data on asthma-related (*e.g.* asthma control) and health-related outcomes (*e.g.* HRQoL) were assessed as secondary outcomes. The revised Cochrane Risk of Bias tool was used to assess risk of bias. Random-effects meta-analyses synthesised data where possible.

**Results** Four randomised controlled trials (all 12 weeks in duration) including 176 adults with moderate-to-severe asthma were included. An increase in physical activity was reported with a moderate-vigorous intensity aerobic and resistance training intervention (steps per day and time spent undertaking physical activity), and an unsupervised pedometer-based intervention (steps per day). Meta-analyses showed that physical activity interventions had an overall positive effect on steps per day (mean difference (MD) 1588, 95% CI 399–2778;  $p=0.009$ ,  $I^2=23$ ), asthma control (MD  $-0.65$ , 95% CI  $-0.95$ – $-0.35$ ;  $p<0.0001$ ,  $I^2=0\%$ ) and HRQoL (MD 0.56, 95% CI 0.10–1.01;  $p=0.02$ ,  $I^2=16\%$ ) compared to control.

**Conclusion** While there is some evidence supporting the effectiveness of interventions in improving physical activity in adults with severe asthma, higher-quality, large-scale studies of longer duration are needed to determine the optimal intervention.

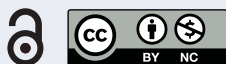

Supplement: inline-supplementary-material-2 [file inline-supplementary-material-2.pdf]
