# Supplementary material
Source: HighWire-hosted journal article supplement (https://erj.ersjournals.com/content/60/6/2200546)
Supplement: inline-supplementary-material-1 [file inline-supplementary-material-1.pdf]

## ONLINE SUPPLEMENT

**Figure S1:** Medline search strategy

Database(s): **Medline** 1946 - present

Search Strategy:

| #  | Searches                                                                                                                                          |
|----|---------------------------------------------------------------------------------------------------------------------------------------------------|
| 1  | "Activities of Daily Living"/                                                                                                                     |
| 2  | activities of daily living.tw.                                                                                                                    |
| 3  | physical activit*.mp.                                                                                                                             |
| 4  | exercise/ or exp running/ or swimming/ or walking/ or stair climbing/                                                                             |
| 5  | (cycl* or walk* or runn* or interval train* or resistance train* or exercis* or intensity train* or weight bearing or hiit or aerobic train*).tw. |
| 6  | circuit-based exercise/ or endurance training/ or high-intensity interval training/ or plyometric exercise/ or resistance training/               |
| 7  | 1 or 2 or 3 or 4 or 5 or 6                                                                                                                        |
| 8  | Asthma/                                                                                                                                           |
| 9  | asthma*.tw.                                                                                                                                       |
| 10 | 8 or 9                                                                                                                                            |
| 11 | pilot stud*.mp.                                                                                                                                   |
| 12 | clinical trial/                                                                                                                                   |
| 13 | Randomized Controlled Trial/                                                                                                                      |
| 14 | (random* or trial or group or intervention* or observational or case-control or longitudinal or pre-post or crossover).tw.                        |
| 15 | 11 or 12 or 13 or 14                                                                                                                              |
| 16 | 7 and 10 and 15                                                                                                                                   |
| 17 | animals/ not humans/                                                                                                                              |
| 18 | 16 not 17                                                                                                                                         |

**Figure S2: CINAHL search strategy**

| #   | Query                                                                                                                                                                                                                                  | Limiters/Expanders                                                                         | Last Run Via                                                                                              | Results |
|-----|----------------------------------------------------------------------------------------------------------------------------------------------------------------------------------------------------------------------------------------|--------------------------------------------------------------------------------------------|-----------------------------------------------------------------------------------------------------------|---------|
| S21 | S19 NOT S18                                                                                                                                                                                                                            | Limiters - Human<br>Expanders - Apply equivalent subjects<br>Search modes - Boolean/Phrase | Interface - EBSCOhost Research Databases<br>Search Screen - Advanced Search<br>Database - CINAHL Complete | Display |
| S20 | S19 NOT S18                                                                                                                                                                                                                            | Expanders - Apply equivalent subjects<br>Search modes - Boolean/Phrase                     | Interface - EBSCOhost Research Databases<br>Search Screen - Advanced Search<br>Database - CINAHL Complete | Display |
| S19 | S8 AND S12 AND S17                                                                                                                                                                                                                     | Expanders - Apply equivalent subjects<br>Search modes - Boolean/Phrase                     | Interface - EBSCOhost Research Databases<br>Search Screen - Advanced Search<br>Database - CINAHL Complete | Display |
| S18 | (MH "Animal Studies")                                                                                                                                                                                                                  | Expanders - Apply equivalent subjects<br>Search modes - Boolean/Phrase                     | Interface - EBSCOhost Research Databases<br>Search Screen - Advanced Search<br>Database - CINAHL Complete | Display |
| S17 | S13 or S14 or S15 or S16                                                                                                                                                                                                               | Expanders - Apply equivalent subjects<br>Search modes - Boolean/Phrase                     | Interface - EBSCOhost Research Databases<br>Search Screen - Advanced Search<br>Database - CINAHL Complete | Display |
| S16 | AB "pilot stud" or "randomised controlled trial" or "randomized controlled trial" or group or intervention" or observational or longitudinal or pre-post or crossover                                                                  | Expanders - Apply equivalent subjects<br>Search modes - Boolean/Phrase                     | Interface - EBSCOhost Research Databases<br>Search Screen - Advanced Search<br>Database - CINAHL Complete | Display |
| S15 | TI "pilot stud" or "randomised controlled trial" or "randomized controlled trial" or group or intervention" or observational or longitudinal or pre-post or crossover                                                                  | Expanders - Apply equivalent subjects<br>Search modes - Boolean/Phrase                     | Interface - EBSCOhost Research Databases<br>Search Screen - Advanced Search<br>Database - CINAHL Complete | Display |
| S14 | (MH "Pilot Studies") OR (MH "Cross Sectional Studies")                                                                                                                                                                                 | Expanders - Apply equivalent subjects<br>Search modes - Boolean/Phrase                     | Interface - EBSCOhost Research Databases<br>Search Screen - Advanced Search<br>Database - CINAHL Complete | Display |
| S13 | (MH "Randomized Controlled Trials") OR (MH "Clinical Trials")                                                                                                                                                                          | Expanders - Apply equivalent subjects<br>Search modes - Boolean/Phrase                     | Interface - EBSCOhost Research Databases<br>Search Screen - Advanced Search<br>Database - CINAHL Complete | Display |
| S12 | S9 or S10 or S11                                                                                                                                                                                                                       | Expanders - Apply equivalent subjects<br>Search modes - Boolean/Phrase                     | Interface - EBSCOhost Research Databases<br>Search Screen - Advanced Search<br>Database - CINAHL Complete | Display |
| S11 | AB asthma" or "severe asthma" or "moderate-severe asthma" or "disease refractory asthma" or "treatment resistant asthma" or "difficult to treat asthma" or therapy-resistant asthma" or "steroid-dependent asthma" or "brittle asthma" | Expanders - Apply equivalent subjects<br>Search modes - Boolean/Phrase                     | Interface - EBSCOhost Research Databases<br>Search Screen - Advanced Search<br>Database - CINAHL Complete | Display |
| S10 | TI asthma" or "severe asthma" or "moderate-severe asthma" or "disease refractory asthma" or "treatment resistant asthma" or "difficult to treat asthma" or therapy-resistant asthma" or "steroid-dependent asthma" or "brittle asthma" | Expanders - Apply equivalent subjects<br>Search modes - Boolean/Phrase                     | Interface - EBSCOhost Research Databases<br>Search Screen - Advanced Search<br>Database - CINAHL Complete | Display |
| S9  | (MH "Asthma")                                                                                                                                                                                                                          | Expanders - Apply equivalent subjects<br>Search modes - Boolean/Phrase                     | Interface - EBSCOhost Research Databases<br>Search Screen - Advanced Search<br>Database - CINAHL Complete | Display |
| S8  | S1 or s2 or s3 or s4 or s5 or s6 or s7                                                                                                                                                                                                 | Expanders - Apply equivalent subjects                                                      | Interface - EBSCOhost Research Databases<br>Search Screen - Advanced Search                               | Display |

|    |                                                                                                                                                                                                                                                                        |                                                                        |                                                                                                           |         |
|----|------------------------------------------------------------------------------------------------------------------------------------------------------------------------------------------------------------------------------------------------------------------------|------------------------------------------------------------------------|-----------------------------------------------------------------------------------------------------------|---------|
|    |                                                                                                                                                                                                                                                                        | Search modes - Boolean/Phrase                                          | Database - CINAHL Complete                                                                                |         |
| S7 | AB "resistance train"" or "strength train"" or "weight train"" or "resistance exercis"" or "aerobic train"" or "intensity train"" or "endurance train"" or hilt or walk" or runn" or jog" or sprint" or exercis" or "activities of daily living" or "physical activit" | Expanders - Apply equivalent subjects<br>Search modes - Boolean/Phrase | Interface - EBSCOhost Research Databases<br>Search Screen - Advanced Search<br>Database - CINAHL Complete | Display |
| S6 | TI "resistance train"" or "strength train"" or "weight train"" or "resistance exercis"" or "aerobic train"" or "intensity train"" or "endurance train"" or hilt or walk" or runn" or jog" or sprint" or exercis" or "activities of daily living" or "physical activit" | Expanders - Apply equivalent subjects<br>Search modes - Boolean/Phrase | Interface - EBSCOhost Research Databases<br>Search Screen - Advanced Search<br>Database - CINAHL Complete | Display |
| S5 | (MH "Walking")                                                                                                                                                                                                                                                         | Expanders - Apply equivalent subjects<br>Search modes - Boolean/Phrase | Interface - EBSCOhost Research Databases<br>Search Screen - Advanced Search<br>Database - CINAHL Complete | Display |
| S4 | (MH "Jogging") OR (MH "Sprinting") OR (MH "Running") OR "running or jogging or run or jog"                                                                                                                                                                             | Expanders - Apply equivalent subjects<br>Search modes - Boolean/Phrase | Interface - EBSCOhost Research Databases<br>Search Screen - Advanced Search<br>Database - CINAHL Complete | Display |
| S3 | (MH "Exercise") OR (MH "Resistance Training") OR (MH "Group Exercise")                                                                                                                                                                                                 | Expanders - Apply equivalent subjects<br>Search modes - Boolean/Phrase | Interface - EBSCOhost Research Databases<br>Search Screen - Advanced Search<br>Database - CINAHL Complete | Display |
| S2 | (MH "Physical Activity") OR (MH "Exercise")                                                                                                                                                                                                                            | Expanders - Apply equivalent subjects<br>Search modes - Boolean/Phrase | Interface - EBSCOhost Research Databases<br>Search Screen - Advanced Search<br>Database - CINAHL Complete | Display |
| S1 | (MH "Activities of Daily Living")                                                                                                                                                                                                                                      | Expanders - Apply equivalent subjects<br>Search modes - Boolean/Phrase | Interface - EBSCOhost Research Databases<br>Search Screen - Advanced Search<br>Database - CINAHL Complete | Display |

**Figure S3 – EMBASE search strategy**

|    |                                                                                                                                                                                                                                                                                                       |
|----|-------------------------------------------------------------------------------------------------------------------------------------------------------------------------------------------------------------------------------------------------------------------------------------------------------|
| 1  | daily life activity/                                                                                                                                                                                                                                                                                  |
| 2  | "activities of daily living".mp.                                                                                                                                                                                                                                                                      |
| 3  | "daily life activity".tw.                                                                                                                                                                                                                                                                             |
| 4  | physical activity/ or "physical activity, capacity and performance"/ or climbing/ or cycling/ or jogging/ or jumping/ or lifting effort/ or running/ or swimming/ or walking/ or weight bearing/ or weight lifting/                                                                                   |
| 5  | (physical activit* or climb* or walk* or cycl* or jogg* or swimm* or weight bearing or weight lifting or interval train* or resistance train* or hiit or aerobic train* or endurance train*).tw.                                                                                                      |
| 6  | high intensity interval training/ or exercise/                                                                                                                                                                                                                                                        |
| 7  | aerobic exercise/ or aquatic exercise/ or arm exercise/ or breathing exercise/ or circuit training/ or dynamic exercise/ or endurance training/ or high intensity interval training/ or isokinetic exercise/ or leg exercise/ or pilates/ or plyometrics/ or resistance training/ or static exercise/ |
| 8  | 1 or 2 or 3 or 4 or 5 or 6 or 7                                                                                                                                                                                                                                                                       |
| 9  | asthma/ or severe persistent asthma/                                                                                                                                                                                                                                                                  |
| 10 | asthma*.tw.                                                                                                                                                                                                                                                                                           |
| 11 | 9 or 10                                                                                                                                                                                                                                                                                               |
| 12 | randomized controlled trial/                                                                                                                                                                                                                                                                          |
| 13 | pilot study/                                                                                                                                                                                                                                                                                          |
| 14 | clinical trial/                                                                                                                                                                                                                                                                                       |
| 15 | case control study/                                                                                                                                                                                                                                                                                   |
| 16 | (random* or trial or intervention* or observational or case-control or longitudinal or pre-post or crossover).tw.                                                                                                                                                                                     |
| 17 | 12 or 13 or 14 or 15 or 16                                                                                                                                                                                                                                                                            |
| 18 | 8 and 11 and 17                                                                                                                                                                                                                                                                                       |
| 19 | animals/ not humans/                                                                                                                                                                                                                                                                                  |
| 20 | 18 not 19                                                                                                                                                                                                                                                                                             |
| 21 | limit 20 to english language                                                                                                                                                                                                                                                                          |

**Figure S4** – Pubmed (non-medline) search terms

((((((((((((((((((((((("activities of daily living"[All Fields]) OR ("physical activity"[All Fields])) OR ("exercise"[All Fields])) OR ("running"[All Fields])) OR ("jogging"[All Fields])) OR ("cycling"[All Fields])) OR ("climbing"[All Fields])) OR ("walking"[All Fields])) OR ("interval training"[All Fields])) OR ("resistance training"[All Fields])) OR ("high intensity training"[All Fields])) OR ("weight bearing exercise"[All Fields])) OR ("hiit"[All Fields])) OR ("aerobic training"[All Fields])) OR ("circuit training"[All Fields])) OR ("endurance training"[All Fields])) OR ("endurance exercise"[All Fields])) AND ("asthma"[All Fields])) OR ("severe asthma"[All Fields])) OR ("difficult asthma"[All Fields])) OR ("treatment resistant asthma"[All Fields])) OR ("brittle asthma"[All Fields])) AND ("randomized controlled trial"[All Fields])) OR ("clinical trial"[All Fields])) OR ("pre post trial"[All Fields])) OR ("observational study"[All Fields]))

**Figure S5** – Informit (health collection) search strategy

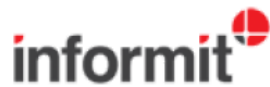

## Search History

| Set | Search Terms                                                                                                                                                                                                                                                                                                                                                                                                                                                                                                                                                                                                                                                         | Limits |
|-----|----------------------------------------------------------------------------------------------------------------------------------------------------------------------------------------------------------------------------------------------------------------------------------------------------------------------------------------------------------------------------------------------------------------------------------------------------------------------------------------------------------------------------------------------------------------------------------------------------------------------------------------------------------------------|--------|
| 3   | ("activities of daily living" OR "physical activit*" OR exercis* OR runn* OR jogg* OR cycling OR climb* OR walk* OR "interval train*" OR "resistance train*" OR "intensity train*" OR "weight bearing" OR hiit OR "aerobic train*" OR "circuit-based exercise" OR "endurance train*" OR "high-intensity interval train*" OR "resistance train*") AND (asthma* OR "severe asthma" OR "disease refractory asthma" OR "treatment resistant asthma" OR "difficult to treat asthma" OR "therapy-resistant asthma" OR "steroid-dependent asthma" OR "brittle asthma")                                                                                                      |        |
| 2   | ("activities of daily living" OR "physical activit*" OR exercis* OR runn* OR jogg* OR cycling OR climb* OR walk* OR "interval train*" OR "resistance train*" OR "intensity train*" OR "weight bearing" OR hiit OR "aerobic train*" OR "circuit-based exercise" OR "endurance train*" OR "high-intensity interval train*" OR "resistance train*") AND (asthma* OR "severe asthma" OR "disease refractory asthma" OR "treatment resistant asthma" OR "difficult to treat asthma" OR "therapy-resistant asthma" OR "steroid-dependent asthma" OR "brittle asthma") AND ("randomi?ed controlled trial" OR "pilot stud*" OR "clinical trial" OR "trial" OR intervention*) |        |
| 1   | "exercis*" AND ("severe asthma")                                                                                                                                                                                                                                                                                                                                                                                                                                                                                                                                                                                                                                     |        |

**Figure S6 – SPORTDiscus search strategy**

| #  | Query                                                                                                                                                                                                                                                                                                                                                                                                                                                                                                                                                                                                                                                                                                                                                                                                                                                        | Limiters/Expanders                                                                                                                                        | Last Run Via                                                                                                                  |
|----|--------------------------------------------------------------------------------------------------------------------------------------------------------------------------------------------------------------------------------------------------------------------------------------------------------------------------------------------------------------------------------------------------------------------------------------------------------------------------------------------------------------------------------------------------------------------------------------------------------------------------------------------------------------------------------------------------------------------------------------------------------------------------------------------------------------------------------------------------------------|-----------------------------------------------------------------------------------------------------------------------------------------------------------|-------------------------------------------------------------------------------------------------------------------------------|
| S1 | ( "activities of daily living"<br>OR " physical activit*" OR<br>exercis* OR runn* OR<br>jogg* OR cycling OR<br>climb* OR walk* OR<br>"interval train*" OR<br>"resistance train*" OR<br>"intensity train*" OR<br>"weight bearing" OR hiit<br>OR "aerobic train*" OR<br>"circuit-based exercise"<br>OR "endurance train*" OR<br>OR "high-intensity<br>interval train*" OR<br>"resistance train*" ) AND<br>( asthma* OR "severe<br>asthma" OR "disease<br>refractory asthma" OR<br>"treatment resistant<br>asthma" OR "difficult to<br>treat asthma" OR<br>"therapy-resistant<br>asthma" OR "steroid-<br>dependent asthma" OR<br>"brittle asthma" ) AND ( "randomi?ed controlled<br>trial" OR random* OR<br>group OR observational<br>OR "pilot stud*" OR<br>"clinical trial" OR "trial"<br>OR intervention* OR<br>crossover OR "pre-post"<br>OR longitudinal ) | Limiters - Published<br>Date: 19790101-<br>20200931; Language:<br>English<br>Expanders - Apply<br>equivalent subjects<br>Search modes -<br>Boolean/Phrase | Interface - EBSCOhost<br>Research Databases<br>Search Screen - Advanced<br>Search<br>Database - SPORTDiscus with<br>Full Text |

**Table-S1: Summary of physical activity outcomes reported in included studies**

| Study                                                |                     | N             | Baseline                                                    | Post-intervention                                    | Change                                                   | Included in meta-analysis                 | ROB           |
|------------------------------------------------------|---------------------|---------------|-------------------------------------------------------------|------------------------------------------------------|----------------------------------------------------------|-------------------------------------------|---------------|
| Daily step count (steps/day)                         |                     |               |                                                             |                                                      |                                                          |                                           |               |
| Freitas, 2017/18                                     | IG:<br>CG:          | 26<br>25      | 7306 ± 2304<br>7764 ± 2176                                  | 10000.2 ± 3492.4 <sup>a</sup><br>8493.4 ± 2474.0     | 3274 ± 2693 <sup>b</sup><br>729 ± 1145                   | Yes – Figure 2                            | Some concerns |
| Coelho, 2018                                         | IG<br>CG:           | 20<br>17      | 7295 ± 3241<br>6998 ± 3490                                  | 8853 ± 3320 <sup>c</sup><br>6248 ± 2030              | -                                                        | Yes – Figure 2                            | High          |
| Evaristo, 2020                                       | IG:<br>CG:          | 29<br>25      | 9186 (7926, 10446)*<br>8809 (7428, 10189)*                  | 11 192 (9649, 12 735)*<br>10 976 (9298, 12 293)*     | -                                                        | Yes – Figure 2                            | Some concerns |
| Turk, 2020                                           | IG1:<br>IG2:<br>CG: | 14<br>7<br>10 | 5997 (4024, 8048)<br>5616 (4306, 6080)<br>7413 (2962, 8155) | -                                                    | 1008 (70, 2994)<br>3097 (1785, 4740)<br>1281 (-65, 4036) | No – post-intervention data not available | -             |
| Light-intensity physical activity (minutes/day)      |                     |               |                                                             |                                                      |                                                          |                                           |               |
| Freitas, 2018                                        | IG:<br>CG:          | 26<br>25      | 340.9 ± 71.4<br>369.4 ± 63.7                                | 395.7 ± 72.5 <sup>d</sup><br>366.6 ± 67.5            | 54.8<br>-2.8 <sup>e</sup>                                | No – insufficient studies                 | -             |
| Moderate to vigorous physical activity (minutes/day) |                     |               |                                                             |                                                      |                                                          |                                           |               |
| Freitas, 2018                                        | IG:<br>CG:          | 26<br>25      | 25.3 ± 14.5<br>26.3 ± 16.9                                  | 43.5 ± 22.2 <sup>a</sup><br>34.2 ± 19.9 <sup>d</sup> | 18.2 ± 17.9 <sup>b</sup><br>7.9 ± 13.8                   | No – insufficient studies                 | -             |
| Sedentary time (minutes/day)                         |                     |               |                                                             |                                                      |                                                          |                                           |               |
| Freitas, 2018                                        | IG:<br>CG:          | 26<br>25      | 488.9 ± 84.2<br>489.5 ± 143.4                               | 477.3 ± 86.1<br>497.0 ± 104.4                        | -11.6 <sup>e</sup><br>7.5 <sup>e</sup>                   | No – insufficient studies                 |               |
| Physical activity level (PAL)                        |                     |               |                                                             |                                                      |                                                          |                                           |               |
| Turk, 2020                                           | IG1:<br>IG2:<br>CG: | 14<br>7<br>10 | 1.48 ± 0.16<br>1.43 ± 0.09<br>1.47 ± 0.14                   | -                                                    | 0.00 ± 0.18<br>0.11 ± 0.08 <sup>d</sup><br>0.04 ± 0.08   | No – insufficient studies                 | -             |

Data reported as mean ± SD or median (interquartile range; IQR), unless otherwise stated. \*mean (95% confidence interval; CI),

<sup>a</sup>p<0.001 versus baseline, <sup>b</sup>p<0.001 versus control, <sup>c</sup>p<0.05 versus control post-intervention, <sup>d</sup>p<0.05 versus baseline. <sup>e</sup>mean change calculated from baseline and post-intervention data, insufficient information to calculate SD of mean change.



**Table-S2: Summary of asthma-related outcomes reported in included studies**

| Study                                 |                     | N             | Baseline                                                    | Post-intervention                                | Change                                                             | Included in meta-analysis                 | ROB           |
|---------------------------------------|---------------------|---------------|-------------------------------------------------------------|--------------------------------------------------|--------------------------------------------------------------------|-------------------------------------------|---------------|
| Health-related quality of life (AQLQ) |                     |               |                                                             |                                                  |                                                                    |                                           |               |
| Freitas, 2017                         | IG:<br>CG:          | 26<br>25      | 3.7 ± 1.1<br>3.6 ± 0.9                                      | 4.9 ± 1.3 <sup>a</sup><br>4.0 ± 1.0 <sup>b</sup> | -                                                                  | Yes – Figure 3a                           | Some concerns |
| Coelho, 2018                          | IG<br>CG:           | 20<br>17      | 4.5 ± 1.4<br>4.2 ± 1.3                                      | 4.9 ± 1.6<br>4.3 ± 1.6                           | -                                                                  | Yes – Figure 3a                           | Some concerns |
| Evaristo, 2020                        | IG:<br>CG:          | 29<br>25      | 3.9 ± 1.1<br>4.2 ± 1.0                                      | 4.7 ± 1.0 <sup>d</sup><br>4.5 ± 1.3              | -                                                                  | Yes – Figure 3a                           | Some concerns |
| Turk, 2020                            | IG1:<br>IG2:<br>CG: | 14<br>7<br>10 | 4.77 (4.33, 5.43)<br>4.40 (4.13, 5.33)<br>4.47 (3.47, 5.00) | -                                                | 0.2 (-0.33, 0.84)<br>1.47 (-0.4, 1.74)<br>0.12 (-0.26, 0.62)       | No – post-intervention data not available | -             |
| Asthma control (ACQ)                  |                     |               |                                                             |                                                  |                                                                    |                                           |               |
| Freitas, 2017 (ACQ-7)                 | IG:<br>CG:          | 26<br>25      | 2.0 ± 0.9<br>2.0 ± 0.7                                      | 1.1 ± 0.7 <sup>a</sup><br>1.8 ± 0.5              | -                                                                  | Yes – Figure 3b                           | Some concerns |
| Coelho, 2018 (ACQ-7)                  | IG<br>CG:           | 20<br>17      | 1.7 ± 1.4<br>1.8 ± 0.8                                      | 1.5 ± 1.2<br>1.9 ± 1.1                           | -                                                                  | Yes – Figure 3b                           | Some concerns |
| Evaristo, 2020 (ACQ-6)                | IG:<br>CG:          | 29<br>25      | 2.0 (1.6-6.3)*<br>1.7 (1.2–2.0)*                            | 1.3 (0.9-1.6) <sup>a*</sup><br>1.5 (1.0-1.8)*    | -                                                                  | No – data non-parametric (median 95% CI)  | -             |
| Turk, 2020                            | IG1:<br>IG2:<br>CG: | 14<br>7<br>10 | 2.17 (1.46, 2.50)<br>1.67 (1.17, 1.83)<br>2.09 (1.50, 2.68) | -                                                | -0.67 (-1.42, 0.00)<br>-0.66 (-0.17, -0.33)<br>-0.25 (-0.66, 0.63) | No – post-intervention data not available | -             |

Data reported as mean ± SD or median (IQR), unless otherwise stated. \*median (95% CI). <sup>a</sup>p<0.001 versus baseline, <sup>b</sup>p<0.05 versus baseline, <sup>c</sup>p<0.05 versus control post-intervention, <sup>d</sup>p<0.001 time effect

**Table-S2 continued: Summary of asthma-related outcomes reported in included studies**

| Study                                     |      | N  | Baseline          | Post-intervention | Change                         | Included in meta-analysis | ROB           |
|-------------------------------------------|------|----|-------------------|-------------------|--------------------------------|---------------------------|---------------|
| Asthma control (asthma symptom-free days) |      |    |                   |                   |                                |                           |               |
| Freitas, 2018                             | IG:  | 26 | 6.5 ± 7.6         | 21.3 ± 7.9        | 14.5 ± 9.6                     | Yes – Figure 3c           | Some concerns |
|                                           | CG:  | 25 | 5.2 ± 5.3         | 12.2 ± 8.7        | 8.6 ± 11.4                     |                           |               |
| Evaristo, 2020                            | IG:  | 29 | 6 (2.7, 9.7)*     | 12 (8.4, 15.6)*   | -                              | Yes – Figure 3c           | Some concerns |
|                                           | CG:  | 25 | 8 (3.8, 11.7)*    | 11 (6.6, 14.6)*   |                                |                           |               |
| Airway inflammation                       |      |    |                   |                   |                                |                           |               |
| Freitas, 2017 (FeNO)                      | IG:  | 26 | 24.7 (15.3, 33.7) | -                 | -6.8 (-14.6, 0.7) <sup>a</sup> | No                        | -             |
|                                           | CG:  | 25 | 22.3 (16.2, 32.6) |                   | -0.2 (3.9, 1.6)                |                           |               |
| Turk, 2020 (FeNO)                         | IG1: | 14 | 18.0 (10.5, 25.0) | -                 | -0.5 (-3.3, 3.3)               | No                        |               |
|                                           | IG2: | 7  | 17. (16.0, 25.0)  |                   | 0.5 (-7.3, 6.5)                |                           |               |
|                                           | CG:  | 10 | 17.0 (8.5, 26.0)  |                   | -0.5 (-14.8, 4.0)              |                           |               |
| Turk, 2020 (sputum neutrophils %)         | IG1: | 14 | 37.2 (28.4, 51.0) | -                 | -3.6 (-33.5, 35.9)             | No                        | -             |
|                                           | IG2: | 7  | 29.6 (23.4, 57.9) |                   | 15.1 (-9.8, 22.4)              |                           |               |
|                                           | CG:  | 10 | 49.4 (39.6, 57.2) |                   | -7.2 (-49.1, -7.2)             |                           |               |
| Turk, 2020 (sputum eosinophil %)          | IG1: | 14 | 0.65 (0.05, 4.30) | -                 | -0.15 (-2.40, 1.13)            | No                        | -             |
|                                           | IG2: | 7  | 0.90 (0.23, 4.05) |                   | 0.00 (-0.83, 1.05)             |                           |               |
|                                           | CG:  | 10 | 0.65 (0.50, 2.90) |                   | 1.20 (0.25, 3.05)              |                           |               |

Data reported as mean ± SD or median (IQR), unless otherwise stated. \*mean (95% CI). <sup>a</sup>p<0.001 versus baseline, <sup>b</sup>p<0.05 versus baseline, <sup>c</sup>p<0.05 versus control post-intervention, <sup>d</sup>p<0.001 time effect

**Table-S3: Summary of health-related outcomes reported in included studies**

| Study               |                     | N             | Baseline                                        | Post-intervention | Change                                                                   | Included in meta-analysis | ROB |
|---------------------|---------------------|---------------|-------------------------------------------------|-------------------|--------------------------------------------------------------------------|---------------------------|-----|
| Weight              |                     |               |                                                 |                   |                                                                          |                           |     |
| Freitas, 2017       | IG:<br>CG:          | 26<br>25      | 91.1 (86.3, 99.8)<br>88.6 (84.4, 94.4)          | -                 | -6.1 (-7.4, -4.2) <sup>a</sup><br>-2.9 (-3.9, -1.4) <sup>a</sup>         | No                        | -   |
| Turk, 2020          | IG1:<br>IG2:<br>CG: | 14<br>7<br>10 | 103.3 ± 17.76<br>106.3 ± 10.87<br>100.7 ± 17.56 | -                 | -4.9 ± 4.9 <sup>b</sup><br>-10.9 ± 8.4 <sup>b</sup><br>-0.1 ± 1.7        | No                        | -   |
| Body mass index     |                     |               |                                                 |                   |                                                                          |                           |     |
| Freitas, 2017       | IG:<br>CG:          | 26<br>25      | 37.7 (35.4, 40.1)<br>37.4 (35.2, 38.7)          | -                 | -2.7 (-3.3, -1.8) <sup>a</sup><br>-1.1 (-1.8, -0.4) <sup>a</sup>         | No                        | -   |
| Turk, 2020          | IG1:<br>IG2:<br>CG: | 14<br>7<br>10 | 36.7 ± 4.8<br>36.8 ± 5.0<br>35.2 ± 3.9          | -                 | -1.81 ± 1.79 <sup>b,d</sup><br>-3.62 ± 2.73 <sup>b</sup><br>0.25 ± 0.65  | No                        | -   |
| Waist circumference |                     |               |                                                 |                   |                                                                          |                           |     |
| Freitas, 2017       | IG:<br>CG:          | 26<br>25      | 111.0 (106.0, 118.0)<br>112.0 (106.1, 117.2)    | -                 | -6.2 (-11.0, -3.0) <sup>a</sup><br>-4.0 (-6.0, -0.9) <sup>a</sup>        | No                        | -   |
| Turk, 2020          | IG1:<br>IG2:<br>CG: | 14<br>7<br>10 | 109.7 ± 13.7<br>114.3 ± 8.8<br>107.0 ± 10.5     | -                 | -3.68 ± 7.23<br>-12.14 ± 9.84<br>4.67 ± 11.96                            | No                        | -   |
| Fat mass %          |                     |               |                                                 |                   |                                                                          |                           |     |
| Turk, 2020          | IG1:<br>IG2:<br>CG: | 14<br>7<br>10 | 44.7 ± 5.9<br>39.6 ± 11.8<br>44.1 ± 4.5         | -                 | -1.41 ± 1.36 <sup>b,d</sup><br>-2.01 ± 3.86 <sup>b</sup><br>-0.33 ± 1.75 | No                        | -   |

Data reported as mean ± SD or median (IQR), unless otherwise stated. <sup>a</sup>p<0.001 versus baseline, <sup>b</sup>p<0.05 versus baseline, <sup>c</sup>p<0.01 versus baseline, <sup>d</sup>p<0.05 versus control post-intervention, <sup>e</sup>p<0.001 time effect, <sup>f</sup>p<0.05 group x time, <sup>g</sup>p<0.01 time effect

**Table-S3 continued: Summary of health-related outcomes reported in included studies**

| Study                     |                     | N             | Baseline                                  | Post-intervention                              | Change                                                           | Included in meta-analysis | - ROB         |
|---------------------------|---------------------|---------------|-------------------------------------------|------------------------------------------------|------------------------------------------------------------------|---------------------------|---------------|
| <b>Exercise capacity</b>  |                     |               |                                           |                                                |                                                                  |                           |               |
| Freitas, 2017 (VO2)       | IG:<br>CG:          | 26<br>25      | 1423 (1321, 1591)<br>1291 (1178, 1475)    | -                                              | 156 (91.4, 229.3) <sup>a</sup><br>8.4 (-95.4, 75.6)              | Yes – Figure 3d           | Some concerns |
| Freitas, 2017 (work rate) | IG:<br>CG:          | 26<br>25      | 91.5 (83.0, 103.0)<br>85.0 (69.0, 98.7)   | -                                              | 26.0 (22.0, 39.0) <sup>a</sup><br>12.0 (-2.2, 20.5) <sup>c</sup> | No                        | -             |
| Coelho, 2018 (6MWT- m)    | IG:<br>CG:          | 20<br>17      | 535.5 ± 41.5<br>522.7 ± 76.4              | 549.7 ± 46.1 <sup>d</sup><br>515.5 ± 75.6      | -                                                                | No                        |               |
| Evaristo, 2020 (ISWT)     | IG:<br>CG:          | 29<br>25      | 342 (302-382)*<br>360 (not reported)      | 429 (389-470) <sup>fg*</sup><br>412 (369-456)* | -                                                                | No                        | -             |
| Turk, 2020 (VO2 max %)    | IG1:<br>IG2:<br>CG: | 14<br>7<br>10 | 51.1 ± 17.7<br>60.6 ± 11.3<br>56.5 ± 11.3 | -                                              | 13.2 ± 9.2 <sup>h</sup><br>11.2 ± 13.5<br>-0.1 ± 10.5            | Yes – Figure 3d           | Some concerns |
| Turk, 2020 (6MWT - m)     | IG1:<br>IG2:<br>CG: | 14<br>7<br>10 | 578 ± 76<br>606 ± 56<br>587 ± 73          | -                                              | 52 ± 40 <sup>h</sup><br>63 ± 40 <sup>b</sup><br>-14 ± 51         | No                        | -             |
| <b>Anxiety score</b>      |                     |               |                                           |                                                |                                                                  |                           |               |
| Coelho, 2018              | IG:<br>CG:          | 20<br>17      | 9.4 ± 5.6<br>11.1 ± 5.3                   | 8.3 ± 5.9<br>10.1 ± 4.8                        | -                                                                | Yes – Figure 3e           | Some concerns |
| Evaristo, 2020            | IG:<br>CG:          | 29<br>25      | 8.7 ± 3.9<br>8.6 ± 4.6                    | 7.7 ± 3.6 <sup>e</sup><br>7.2 ± 4.4            | -                                                                | Yes – Figure 3e           | Some concerns |
| <b>Depression score</b>   |                     |               |                                           |                                                |                                                                  |                           |               |
| Coelho, 2018              | IG:<br>CG:          | 20<br>17      | 7.2 ± 4.6<br>8.1 ± 4.2                    | 5.8 ± 4.9<br>7.6 ± 4.6                         | -                                                                | Yes – Figure 3f           | Some concerns |
| Evaristo, 2020            | IG:<br>CG:          | 29<br>25      | 7.2 ± 3.8<br>8.3 ± 4.4                    | 5.7 ± 4.3 <sup>e</sup><br>6.2 ± 3.9            | -                                                                | Yes – Figure 3f           | Some concerns |

Data reported as mean ± SD or median (IQR), unless otherwise stated. \*mean (95% CI). <sup>a</sup>p<0.001 versus baseline, <sup>b</sup>p<0.05 versus baseline, <sup>c</sup>p<0.01 versus baseline, <sup>d</sup>p<0.05 versus control post-intervention, <sup>e</sup>p<0.001 time effect, <sup>f</sup>p<0.05 group x time, <sup>g</sup>p<0.01 time effect

**Table S4: Sensitivity analysis**

| <i>Outcome</i>                   | Random-effects analysis |                  |                                        |                | Fixed-effects analysis                 |                |
|----------------------------------|-------------------------|------------------|----------------------------------------|----------------|----------------------------------------|----------------|
|                                  | Studies (n)             | Participants (n) | Effect estimate                        | I <sup>2</sup> | Effect estimate                        | I <sup>2</sup> |
| <i>Steps/day</i>                 | 3                       | IG: 75, CG: 67   | MD [95% CI]: 1588.58 [399.15, 2778.00] | 23%            | MD [95% CI]: 1609.86 [573.28, 2646.45] | 23%            |
| <i>AQLQ</i>                      | 3                       | IG: 75, CG: 67   | MD [95% CI]: 0.56 [0.10, 1.01]         | 16%            | MD [95% CI]: 0.55 [0.14, 0.96]         | 16%            |
| <i>ACQ</i>                       | 2                       | IG: 46, CG: 42   | MD [95% CI]: -0.65 [-0.95, -0.35]      | 0%             | MD [95% CI]: -0.65 [-0.95, -0.35]      | 0%             |
| <i>Asthma symptom-free days</i>  | 2                       | IG: 55, CG: 50   | MD [95% CI]: 5.14 [-2.80, 13.08]       | 81%            | MD [95% CI]: 5.53 [2.11, 8.94]         | 81%            |
| <i>Exercise capacity (VO2)*</i>  | 2                       | IG: 40, CG: 35   | SMD [95% CI]: 1.32 [0.81, 1.82]        | 0%             | SMD [95% CI]: 1.32 [0.81, 1.82]        | 0%             |
| <i>Anxiety score (HADS-A)</i>    | 2                       | IG: 49, CG: 42   | MD [95% CI]: -0.24 [-2.35, 1.87]       | 18%            | MD [95% CI]: -0.15 [-1.98, 1.68]       | 18%            |
| <i>Depression score (HADS-D)</i> | 2                       | IG: 49, CG: 42   | MD [95% CI]: -1.13 [-3.04, 0.78]       | 0%             | MD [95% CI]: -1.13 [-3.04, 0.78]       | 0%             |

AQLQ, asthma quality of life questionnaire; ACQ, asthma control questionnaire; VO2, maximum oxygen consumption; HADS-A, anxiety subscale of the hospital anxiety and depression scale; HADS-D, depression subscale of the hospital anxiety and depression scale; IG, intervention group; CG, control group; MD, mean difference; CI, confidence interval; SMD, standardised mean difference. \*change from baseline data analysed.

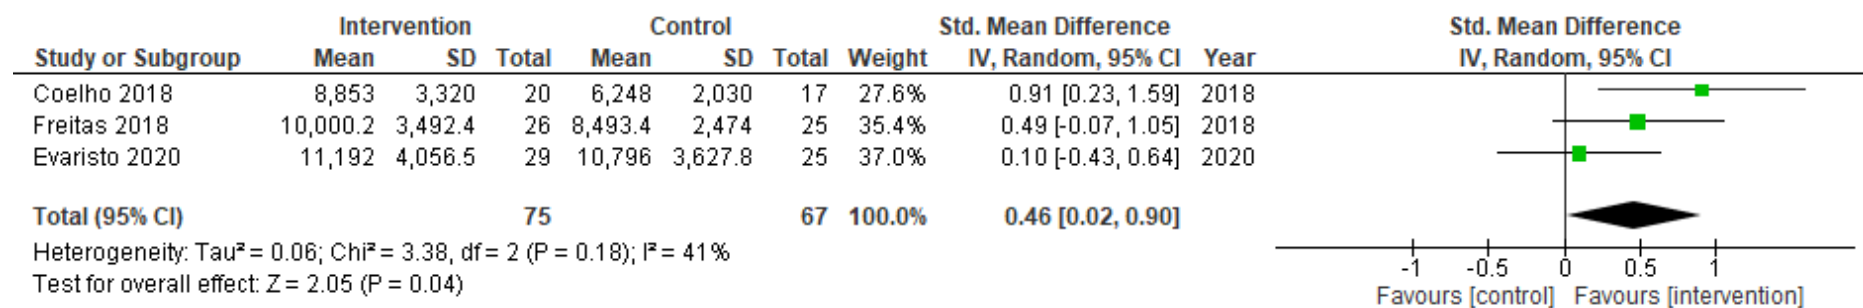

**Figure S7.** Random effects meta-analysis of randomised controlled trials examining the effect of physical activity interventions versus control on steps per day (post-intervention).
